# Supplementary material for: Advanced statistical analysis and discrimination of gunshot residue implementing combined Raman and FT-IR data
Source: Royal Society of Chemistry journal article supplement (doi:10.1039/c3ay40721g), 2013-01-01
Supplement: c3ay40721g.pdf [file c3ay40721g.pdf]

# Advanced statistical analysis and discrimination of gunshot residue implementing combined Raman and FT-IR data

Justin Bueno and Igor K. Lednev\*<sup>a</sup>

<sup>a</sup> 1400 Washington Avenue, Albany, New York 12222, United States. Fax: (518) 442-3462; Tel: (518) 591-886; E-mail: [ilednev@albany.edu](mailto:ilednev@albany.edu)

## Supplemental Information

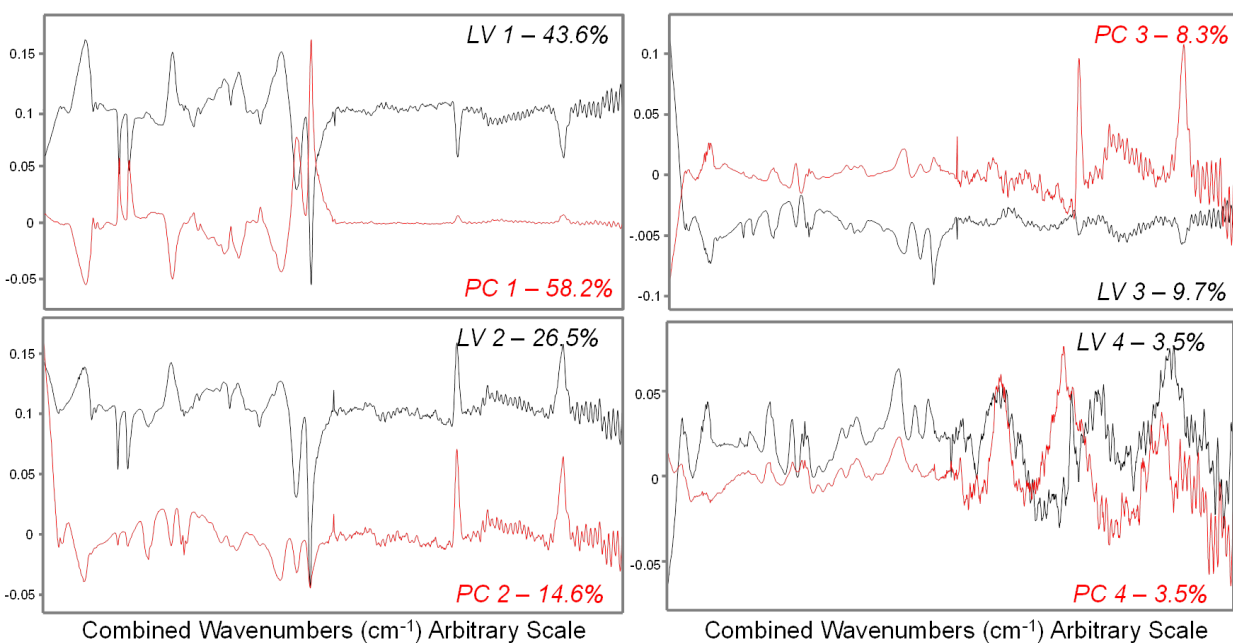

**Figure S1.** Comparison of the statistical treatment of the dataset with two models, PLSDA and PCA. The four most meaningful loadings, latent variables (LVs) and principal components (PCs), for each model are compared. Black traces represent LVs, while red traces represent PCs. Each loading is plotted with their corresponding impact (%) on the dataset. The y-axis corresponds to the scale for the PCs.
